# Supplementary material
Source: PubMed Central journal article supplement (PMC7436489)
Supplement: ACEM-27-910-s001.pdf [file ACEM-27-910-s001.pdf]

## Data Supplement S1. Supplemental material

### Appendix S1: Individual Hospital Characteristics, 12/29/19 to 3/7/20

|                             | All    | Hospital 1 | Hospital 2 | Hospital 3 | Hospital 4 | Hospital 5 | Hospital 6 | Hospital 7 |
|-----------------------------|--------|------------|------------|------------|------------|------------|------------|------------|
| <b>Inpatient Beds, n</b>    | 1,766  | 894        | 198        | N/A*       | 392        | 159        | 98         | 25         |
| <b>ED Visits, n</b>         | 60,421 | 17,312     | 7,272      | 4,645      | 14,437     | 8,091      | 7,132      | 1,532      |
| <b>Admit Rate (%)</b>       | 24.0%  | 30.3%      | 28.4%      | 8.5%       | 26.0%      | 22.1%      | 15.0%      | 11.8%      |
| <b>Age, median</b>          | 41     | 47         | 37         | 30         | 40         | 48         | 33         | 39         |
| <b>Female Gender (%)</b>    | 55.7%  | 54.9%      | 56.9%      | 57.6%      | 54.4%      | 56.0%      | 57.9%      | 53.2%      |
| <b>Race (%)</b>             |        |            |            |            |            |            |            |            |
| White                       | 69.2%  | 47.1%      | 73.5%      | 79.4%      | 78.6%      | 85.2%      | 69.5%      | 94.3%      |
| Black                       | 19.1%  | 35.7%      | 16.8%      | 12.7%      | 8.3%       | 5.7%       | 25.8%      | 3.7%       |
| <b>Latinx Ethnicity (%)</b> | 18.4%  | 13.2%      | 33.1%      | 27.2%      | 20.5%      | 14.2%      | 12.0%      | 11.0%      |
| <b>Insurance (%)</b>        |        |            |            |            |            |            |            |            |
| Commercial                  | 41.0%  | 41.7%      | 39.6%      | 43.3%      | 43.2%      | 45.3%      | 31.0%      | 35.3%      |
| Medicaid                    | 26.6%  | 22.2%      | 29.2%      | 35.9%      | 25.5%      | 18.2%      | 39.7%      | 30.8%      |
| Medicare                    | 24.4%  | 26.3%      | 21.5%      | 12.5%      | 24.8%      | 30.6%      | 21.7%      | 27.1%      |
| Self-Pay                    | 6.9%   | 8.5%       | 8.6%       | 7.6%       | 5.7%       | 4.4%       | 6.5%       | 5.5%       |

\*Hospital 3 is a freestanding ED and does not have inpatient beds.

## Appendix S2: List of ICD-10 Diagnoses for Major Classes

The following Major Diagnosis Classes are composed of specific clinical diagnoses (e.g. appendicitis), as identified by the Agency for Healthcare Research and Quality Clinical Classifications Software Refined (AHRQ CCSR) using the primary ICD-10 code associated with the emergency department visit. More information on AHRQ CCSR mapping to specific ICD-10 diagnosis codes can be found at: [https://www.hcup-us.ahrq.gov/toolssoftware/ccsr/ccs\\_refined.jsp](https://www.hcup-us.ahrq.gov/toolssoftware/ccsr/ccs_refined.jsp)

### Cardiac:

CIR011: Coronary atherosclerosis and other heart disease  
CIR015: Other and ill-defined heart disease  
CIR016: Conduction disorders  
CIR017: Cardiac dysrhythmias

### Surgical:

DIG0009: Appendicitis and other appendiceal conditions  
DIG012: Intestinal obstruction and ileus  
DIG017: Biliary tract disease

### Neurologic:

CIR020: Cerebral infarction  
CIR021: Acute hemorrhagic cerebrovascular disease  
CIR024: Other and ill-defined cerebrovascular disease  
NVS0009: Epilepsy; convulsions

### Orthopedic:

INJ004: Fracture of the upper limb, initial encounter  
INJ0005: Fracture of the lower limb (except hip), initial encounter  
INJ006: Fracture of the neck of the femur (hip), initial encounter  
INJ007: Dislocations, initial encounter

### Gastrointestinal:

DIG001: Intestinal infection  
DIG005: Gastroduodenal ulcer  
DIG007: Gastritis and duodenitis  
DIG011: Regional enteritis and ulcerative colitis  
DIG013: Diverticulosis and diverticulitis  
DIG018: Hepatic failure  
DIG020: Pancreatic disorders (excluding diabetes)  
DIG021: Gastrointestinal hemorrhage  
INF007: Hepatitis

### Chronic Respiratory:

CIR019: Heart failure  
RSP008: Chronic obstructive pulmonary disease and bronchiectasis  
RSP009: Asthma

### COVID-19:

Note: COVID-19 is not included in the AHRQ Clinical Classifications Software Refined system. We used the following ICD-10 codes as per CDC guidance:

U07.1: COVID-19  
B97.29: Other coronavirus as the cause of diseases classified elsewhere  
B97.21: SARS-associated coronavirus infection  
Z20.828: Contact with and (suspected) exposure to other viral communicable diseases  
R68.89: Exposure to SARS-associated coronavirus

### Appendix S3: Weekly Emergency Department Visits for Serious Diagnoses in the Historical Control, Pre-Pandemic, and Early Pandemic Periods, by Major Class

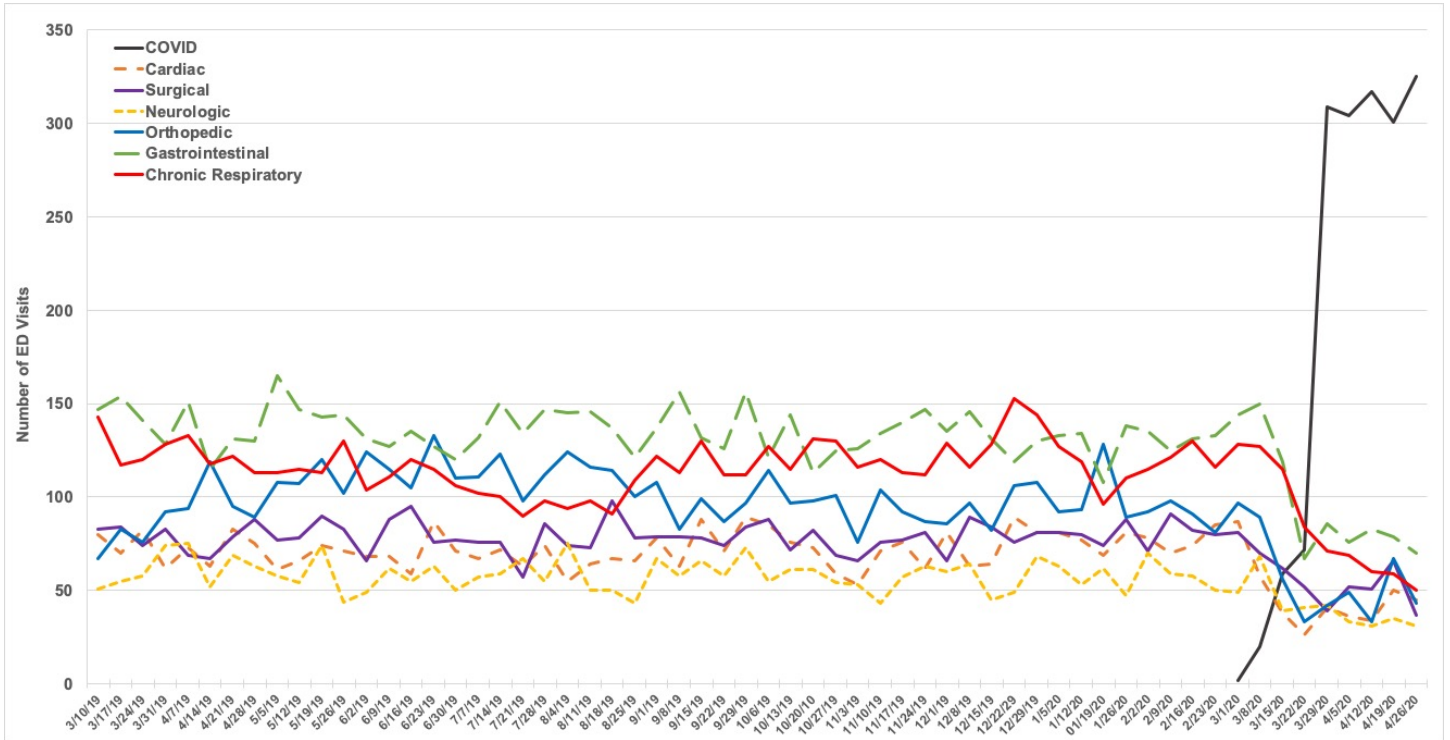

**Appendix S4: Comparison of Emergency Department Visits in the Early Pandemic Period Compared to Pre-Pandemic and Historical Controls, by Major Diagnosis Class**

| Major Diagnosis Class      | Reference Groups                   |                                    |                                          |
|----------------------------|------------------------------------|------------------------------------|------------------------------------------|
|                            | Early Pandemic<br>3/8/20 to 5/2/20 | Pre-Pandemic<br>12/29/19 to 3/7/20 | Historical Control<br>3/10/19 to 4/27/19 |
| <b>Cardiac</b>             |                                    |                                    |                                          |
| Weekly Visits, mean        | 41.0                               | 78.3                               | 73.5                                     |
| IRR* (95% CI)              |                                    | 0.52 (0.44-0.62)                   | 0.56 (0.47-0.67)                         |
| <b>Surgical</b>            |                                    |                                    |                                          |
| Weekly Visits, mean        | 53.6                               | 80.9                               | 78.4                                     |
| IRR (95% CI)               |                                    | 0.66 (0.57-0.77)                   | 0.68 (0.58-0.80)                         |
| <b>Neurologic</b>          |                                    |                                    |                                          |
| Weekly Visits, mean        | 40.0                               | 57.9                               | 62.1                                     |
| IRR (95% CI)               |                                    | 0.69 (0.56-0.86)                   | 0.64 (0.51-0.81)                         |
| <b>Orthopedic</b>          |                                    |                                    |                                          |
| Weekly Visits, mean        | 51.5                               | 96.9                               | 89.4                                     |
| IRR (95% CI)               |                                    | 0.53 (0.41-0.69)                   | 0.58 (0.44-0.75)                         |
| <b>Gastrointestinal</b>    |                                    |                                    |                                          |
| Mean Weekly Visits         | 91.3                               | 131.1                              | 137.1                                    |
| IRR (95% CI)               |                                    | 0.70 (0.56-0.86)                   | 0.67 (0.54-0.83)                         |
| <b>Chronic Respiratory</b> |                                    |                                    |                                          |
| Mean Weekly Visits         | 79.4                               | 120.6                              | 124.3                                    |
| IRR (95% CI)               |                                    | 0.66 (0.52-0.84)                   | 0.64 (0.50-0.81)                         |

\*IRR: Incidence Rate Ratios for the Early Pandemic period, with the Pre-Pandemic and Historical Control periods serving as referents. All comparisons  $p \leq 0.001$ .  
95% CI: 95% confidence interval
